# Supplementary material for: Pyrazolopyrimidinones, a novel class of copper-dependent bactericidal antibiotics against multi-drug resistant S. aureus
Source: Royal Society of Chemistry journal article supplement (doi:10.1039/c8mt00316e), 2019-02-25
Supplement: c8mt00316e3.pdf [file c8mt00316e3.pdf]

## Supplementary Tables

**Title:** “Pyrazolopyrimidinones, a novel class of copper-dependent bactericidal antibiotics against multi-drug resistant *S. aureus*”

**Authors:** Cameron L. Crawford<sup>1</sup>, Alex G. Dalecki<sup>1</sup>, Whitney T. Narmore<sup>1</sup>, Jessica Hoff<sup>1</sup>, Audra A. Hargett<sup>2</sup>, Matthew B. Renfrow<sup>2</sup>, Man Zhang<sup>3</sup>, Madumali Kalubowilage<sup>3</sup>, Stefan H. Bossmann<sup>3</sup>, Stacy L. Queern<sup>4,5</sup>, Suzanne E. Lapi<sup>4,5</sup>, Robert N. Hunter III<sup>6</sup>, Donghui Bao<sup>6</sup>, Corinne E. Augelli-Szafran<sup>6</sup>, Olaf Kutsch<sup>1</sup>, and Frank Wolschendorf<sup>1,#</sup>

<sup>1</sup>Department of Medicine, University of Alabama at Birmingham, Birmingham, AL, USA

<sup>2</sup>Department of Biochemistry and Molecular Genetics, University of Alabama at Birmingham, Birmingham, AL, USA

<sup>3</sup> Department of Chemistry, Kansas State University, Manhattan, KS, USA

<sup>4</sup> Department of Radiology, University of Alabama at Birmingham, Birmingham, AL, USA

<sup>5</sup> Department of Chemistry, Washington University in St. Louis

<sup>6</sup> Department of Chemistry, Drug Discovery Division, Southern Research, Birmingham, AL, USA

**Table S1: Antibiotic resistance profile of MRSA strains.**

All MRSA strains were tested for antibiotic resistance by UAB Laboratory Medicine. R= resistant and S = sensitive. Amox/Cla = Amoxicillin, Amp/Sul = Ampicillin/sulbactam, Cetri = Ceftriaxone, Cipro = Ciprofloxacin, Clinda = Clindamycin, Dapto = Daptomycin, Eryth = Erythromycin, Gent = Gentamicin, Levo = Levofloxacin, Linez = Linezolid, Ox = Oxacillin, Pen = Penicillin, Quin/Dalf = Quinupristin/dalfopristin, Rif = Rifampicin, SXT = Sulfamethaxole/Trimethoprim, Tetra = Tetracycline, and Vanc = Vancomycin.

| ABX       | MRSA-1 | MRSA-2 | MRSA-3 | MRSA-4 | MRSA-5 |
|-----------|--------|--------|--------|--------|--------|
| Amox/Cla  | R      | R      | R      | R      | R      |
| Amp/Sul   | R      | R      | R      | R      | R      |
| Cetri     | R      | R      | R      | R      | R      |
| Cipro     | S      | R      | S      | S      | R      |
| Clinda    | R      | R      | S      | S      | R      |
| Dapto     | S      | S      | S      | S      | S      |
| Eryth     | R      | R      | R      | R      | R      |
| Gent      | S      | S      | S      | S      | S      |
| Levo      | S      | R      | S      | S      | R      |
| Linez     | S      | S      | S      | S      | S      |
| Ox        | R      | R      | R      | R      | R      |
| Pen       | R      | R      | R      | R      | R      |
| Quin/Dalf | S      | S      | S      | S      | S      |
| SXT       | S      | S      | S      | S      | S      |
| Tetra     | R      | S      | S      | S      | S      |
| Vanc      | S      | S      | S      | S      | S      |

**Table S2: Drug-like properties of PZPs.**

MW: molecular weight in g/mol; cLogP:  $\log_{10}$  of Octanol:water partition coefficient; LogSW:  $\log_{10}$  of intrinsic water solubility; RB: rotatable bonds; tPSA: topological polar surface area; hDon: proton donating atoms; hAcc: proton accepting atoms. All values were provided by the supplier ([www.hit2lead.com](http://www.hit2lead.com)).

| PZP | Structure                                                                           | MW    | Mol. Formula                                                    | cLogP | LogSW  | RB | tPSA  | hDon | hAcc |
|-----|-------------------------------------------------------------------------------------|-------|-----------------------------------------------------------------|-------|--------|----|-------|------|------|
| 915 | 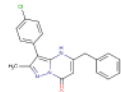   | 349.8 | C <sub>20</sub> H <sub>16</sub> ClN <sub>3</sub> O              | 3.85  | -5.039 | 3  | 50.16 | 1    | 3    |
| 716 |    | 365.4 | C <sub>24</sub> H <sub>19</sub> N <sub>3</sub> O                | 4.31  | -5.545 | 3  | 50.16 | 1    | 3    |
| 720 |    | 301.8 | C <sub>16</sub> H <sub>16</sub> ClN <sub>3</sub> O              | 3.34  | -4.253 | 1  | 50.16 | 1    | 3    |
| 894 |    | 285.7 | C <sub>15</sub> H <sub>12</sub> ClN <sub>3</sub> O              | 2.82  | -3.692 | 1  | 50.16 | 1    | 3    |
| 832 |   | 294.1 | C <sub>13</sub> H <sub>9</sub> Cl <sub>2</sub> N <sub>3</sub> O | 3.04  | -3.942 | 1  | 50.16 | 1    | 3    |
| 284 |  | 253.3 | C <sub>15</sub> H <sub>15</sub> N <sub>3</sub> O                | 2.65  | -3.311 | 1  | 50.16 | 1    | 3    |
| 643 |  | 273.7 | C <sub>14</sub> H <sub>12</sub> ClN <sub>3</sub> O              | 2.28  | -3.144 | 1  | 50.16 | 1    | 3    |

**Table S3: ADME properties of PZP 915.** Half-life of 1  $\mu\text{M}$  915 or 1  $\mu\text{M}$  915 + 0.5  $\mu\text{M}$  Cu was assessed in human liver microsomes. Solubility of 915 was determined in ddH<sub>2</sub>O. Distribution coefficient (LogD) was determined experimentally.

| <b>ID</b> | <b>Half-life (min)</b> | <b>Solubility (<math>\mu\text{M}</math>)</b> | <b>Sol RSD%</b> | <b>LogD</b> |
|-----------|------------------------|----------------------------------------------|-----------------|-------------|
| 915       | 55.9                   | 38                                           | 1.9             | >3.70       |
| 915+Cu    | 52.6                   | 44.4                                         | 6.4             | >3.53       |

**Table S4: Binding constants for M(PZP 915)<sub>3</sub><sup>2+</sup> complexes.** Counter anions: a) bromide, b) sulfate, c) chloride

| 915 metal complexes                      | Binding constant                        | Units                            |
|------------------------------------------|-----------------------------------------|----------------------------------|
| Cu(PZP915) <sub>3</sub> <sup>2+ a)</sup> | $1.12 \times 10^8 \pm 0.02 \times 10^8$ | L <sup>3</sup> mol <sup>-3</sup> |
| Zn(PZP915) <sub>3</sub> <sup>2+b)</sup>  | $6.6 \times 10^8 \pm 0.3 \times 10^8$   | L <sup>3</sup> mol <sup>-3</sup> |
| Fe(PZP915) <sub>3</sub> <sup>2+c)</sup>  | $5.3 \times 10^8 \pm 0.3 \times 10^8$   | L <sup>3</sup> mol <sup>-3</sup> |
| Cu(PZP915) <sub>2</sub> <sup>+ a)</sup>  | $2.35 \times 10^6 \pm 0.9 \times 10^5$  | L <sup>2</sup> mol <sup>-2</sup> |
| Cu(PZP915) <sup>+ a)</sup>               | $3.80 \times 10^5 \pm 0.4 \times 10^4$  | L mol <sup>-1</sup>              |

**Table S5: Binding constants for the individual binding reactions.** Binding constants were calculated based on the assumption of a stepwise addition of ligands.

| 915 Binding Reactions      | Binding Constants  | Units       |
|----------------------------|--------------------|-------------|
| $K1 = Cu+PZP915$           | $3.80 \times 10^5$ | $Lmol^{-1}$ |
| $K2 = Cu(PZP915)+PZP915$   | 6.18               | $Lmol^{-1}$ |
| $K3 = Cu(PZP915)_2+PZP915$ | 47.65              | $Lmol^{-1}$ |
